# Supplementary material for: 5-Demethylnobiletin Inhibits Cell Proliferation, Downregulates ID1 Expression, Modulates the NF-κB/TNF-α Pathway and Exerts Antileukemic Effects in AML Cells
Source: MDPI journal article supplement (doi:10.3390/ijms23137392), 2022-07-02
Supplement: s1 [file s1]

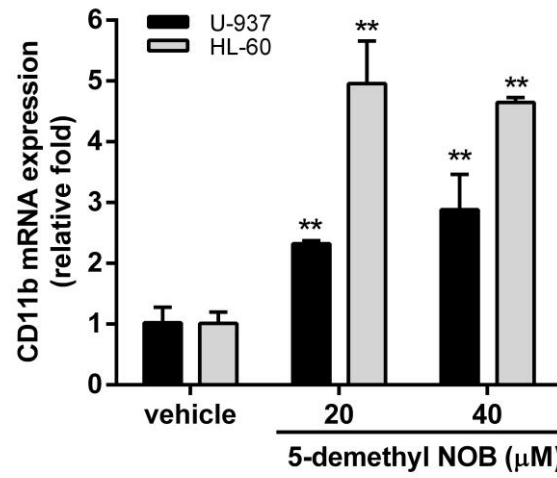

**Figure S1.** 5-Demethyl NOB induced cell differentiation in U-937 and HL-60 cells. U-937 and HL-60 cells were treated with vehicle (0.1% DMSO) or 5-demethyl NOB (20-100 μM) for 48 h. The level of CD11b mRNA was measured by RT-qPCR analysis. The data represent the mean  $\pm$  SD of three independent experiments. \*\* $p < 0.01$  represents significant differences compared to the vehicle-treated group.

**Table S1.** Biological processes in the Gene Ontology (GO) analysis of up- and downregulated genes, associated with DEGs of 5-demethyl NOB-treated THP-1 cells.

| GO ID      | Description                                  | Genes in term | P value    | p. adjust | Count |
|------------|----------------------------------------------|---------------|------------|-----------|-------|
| GO:0009987 | cellular process                             | 15796         | 0.00333839 | 0.08201   | 822   |
| GO:0065007 | biological regulation                        | 12054         | 0.00011811 | 0.008583  | 659   |
| GO:0050789 | regulation of biological process             | 11437         | 0.00017309 | 0.011379  | 628   |
| GO:0008152 | metabolic process                            | 11555         | 0.00824039 | 0.140015  | 618   |
| GO:0071704 | organic substance metabolic process          | 11077         | 0.00199881 | 0.060252  | 601   |
| GO:0050794 | regulation of cellular process               | 10788         | 0.00010994 | 0.008184  | 598   |
| GO:0044237 | cellular metabolic process                   | 10730         | 0.00096117 | 0.037275  | 587   |
| GO:0044238 | primary metabolic process                    | 10696         | 0.00167481 | 0.052791  | 583   |
| GO:0006807 | nitrogen compound metabolic process          | 10182         | 0.00190251 | 0.058629  | 557   |
| GO:0043170 | macromolecule metabolic process              | 9451          | 0.00108518 | 0.039846  | 523   |
| GO:0050896 | response to stimulus                         | 8776          | 0.00612902 | 0.120537  | 481   |
| GO:0051716 | cellular response to stimulus                | 7299          | 0.00084881 | 0.033869  | 415   |
| GO:0019222 | regulation of metabolic process              | 6765          | 1.722E-06  | 0.000865  | 409   |
| GO:0032501 | multicellular organismal process             | 7363          | 0.01896676 | 0.212545  | 403   |
| GO:0009058 | biosynthetic process                         | 6546          | 2.9282E-06 | 0.000872  | 396   |
| GO:0034641 | cellular nitrogen compound metabolic process | 6688          | 9.4535E-05 | 0.007332  | 392   |
| GO:1901576 | organic substance biosynthetic process       | 6475          | 4.4789E-06 | 0.001066  | 391   |
| GO:0044249 | cellular biosynthetic process                | 6378          | 4.3727E-06 | 0.001066  | 386   |
| GO:1901360 | organic cyclic compound metabolic process    | 6286          | 7.2901E-05 | 0.00637   | 372   |
| GO:0006725 | cellular aromatic compound metabolic process | 6071          | 3.7838E-05 | 0.004146  | 363   |
| GO:0023052 | signaling                                    | 6496          | 0.01014626 | 0.15599   | 362   |
| GO:0007154 | cell communication                           | 6516          | 0.01228817 | 0.175259  | 362   |
| GO:0046483 | heterocycle metabolic                        | 6032          | 3.7317E-05 | 0.004146  | 361   |

|            |                                                                 |      |            |          |     |
|------------|-----------------------------------------------------------------|------|------------|----------|-----|
|            | process                                                         |      |            |          |     |
| GO:0032502 | developmental process                                           | 6099 | 0.00030509 | 0.017405 | 357 |
| GO:0048518 | positive regulation of<br>biological process                    | 5680 | 2.3981E-06 | 0.000872 | 351 |
| GO:0048856 | anatomical structure<br>development                             | 5666 | 6.2333E-05 | 0.006048 | 340 |
| GO:0048519 | negative regulation of<br>biological process                    | 5154 | 1.0749E-08 | 7.42E-05 | 337 |
| GO:0007275 | multicellular organism<br>development                           | 5190 | 0.00014024 | 0.009946 | 312 |
| GO:2000112 | regulation of cellular<br>macromolecule biosynthetic<br>process | 4243 | 3.2244E-05 | 0.003905 | 266 |
| GO:0042221 | response to chemical                                            | 4373 | 0.00364282 | 0.086602 | 256 |
| GO:0032774 | RNA biosynthetic process                                        | 3857 | 1.8006E-06 | 0.000865 | 253 |
| GO:0006351 | transcription,<br>DNA-templated                                 | 3823 | 1.2813E-06 | 0.000865 | 252 |
| GO:0097659 | nucleic acid-templated<br>transcription                         | 3841 | 1.8796E-06 | 0.000865 | 252 |
| GO:0048583 | regulation of response to<br>stimulus                           | 4043 | 0.00016188 | 0.010952 | 250 |
| GO:0048869 | cellular developmental<br>process                               | 4207 | 0.00235576 | 0.066375 | 249 |
| GO:2001141 | regulation of RNA<br>biosynthetic process                       | 3690 | 7.2574E-06 | 0.001392 | 240 |
| GO:0006355 | regulation of transcription,<br>DNA-templated                   | 3659 | 5.5756E-06 | 0.001113 | 239 |
| GO:1903506 | regulation of nucleic<br>acid-templated<br>transcription        | 3682 | 8.8807E-06 | 0.00146  | 239 |
| GO:0030154 | cell differentiation                                            | 4036 | 0.00291194 | 0.07643  | 239 |
| GO:0006950 | response to stress                                              | 3854 | 0.00242451 | 0.066787 | 230 |
| GO:0006464 | cellular protein<br>modification process                        | 4108 | 0.04098956 | 0.308212 | 230 |
| GO:0023051 | regulation of signaling                                         | 3432 | 5.402E-05  | 0.005367 | 220 |
| GO:0065008 | regulation of biological<br>quality                             | 3551 | 0.00132138 | 0.044934 | 216 |
| GO:0070887 | cellular response to                                            | 2980 | 5.4047E-06 | 0.001113 | 201 |

|            |                                                             |      |            |          |     |
|------------|-------------------------------------------------------------|------|------------|----------|-----|
|            | chemical stimulus                                           |      |            |          |     |
| GO:0065009 | regulation of molecular function                            | 3359 | 0.00558741 | 0.116925 | 200 |
| GO:0010033 | response to organic substance                               | 3051 | 7.1961E-05 | 0.00637  | 198 |
| GO:0051239 | regulation of multicellular organismal process              | 2864 | 2.8358E-06 | 0.000872 | 196 |
| GO:0002376 | immune system process                                       | 2928 | 5.2793E-05 | 0.005359 | 192 |
| GO:0006793 | phosphorus metabolic process                                | 3309 | 0.02273925 | 0.234658 | 191 |
| GO:0050793 | regulation of developmental process                         | 2442 | 2.5532E-07 | 0.000865 | 177 |
| GO:0032879 | regulation of localization                                  | 2641 | 0.00020558 | 0.012785 | 172 |
| GO:0009653 | anatomical structure morphogenesis                          | 2503 | 2.4323E-05 | 0.003109 | 170 |
| GO:0009605 | response to external stimulus                               | 2238 | 9.5323E-06 | 0.00153  | 157 |
| GO:0006366 | transcription from RNA polymerase II promoter               | 2169 | 2.196E-05  | 0.002972 | 151 |
| GO:0051704 | multi-organism process                                      | 2466 | 0.00829845 | 0.140059 | 150 |
| GO:0006928 | movement of cell or subcellular component                   | 2011 | 1.3191E-06 | 0.000865 | 148 |
| GO:0008219 | cell death                                                  | 2160 | 8.852E-05  | 0.007105 | 147 |
| GO:0016310 | phosphorylation                                             | 2316 | 0.00784535 | 0.134383 | 142 |
| GO:0012501 | programmed cell death                                       | 2031 | 0.00011025 | 0.008184 | 139 |
| GO:0006357 | regulation of transcription from RNA polymerase II promoter | 1978 | 7.2054E-05 | 0.00637  | 137 |
| GO:0009888 | tissue development                                          | 1933 | 3.6836E-05 | 0.004146 | 136 |
| GO:0006468 | protein phosphorylation                                     | 1924 | 0.00067589 | 0.028624 | 128 |
| GO:0040011 | locomotion                                                  | 1762 | 3.5905E-05 | 0.004131 | 126 |
| GO:0008283 | cell proliferation                                          | 2048 | 0.01099745 | 0.166847 | 126 |
| GO:0006955 | immune response                                             | 2071 | 0.02511243 | 0.245708 | 124 |
| GO:0031399 | regulation of protein modification process                  | 1763 | 0.00042735 | 0.020774 | 120 |
| GO:0006952 | defense response                                            | 1651 | 4.3228E-05 | 0.004663 | 119 |
| GO:0048870 | cell motility                                               | 1529 | 5.5445E-06 | 0.001113 | 116 |
| GO:0051674 | localization of cell                                        | 1529 | 5.5445E-06 | 0.001113 | 116 |

|            |                                                                    |      |            |          |     |
|------------|--------------------------------------------------------------------|------|------------|----------|-----|
| GO:0042981 | regulation of apoptotic process                                    | 1507 | 7.7082E-06 | 0.001402 | 114 |
| GO:0019220 | regulation of phosphate metabolic process                          | 1740 | 0.00318326 | 0.079906 | 113 |
| GO:0042592 | homeostatic process                                                | 1683 | 0.0103096  | 0.158149 | 106 |
| GO:0044093 | positive regulation of molecular function                          | 1771 | 0.03733337 | 0.294399 | 106 |
| GO:0042325 | regulation of phosphorylation                                      | 1502 | 0.00127624 | 0.044049 | 102 |
| GO:0002682 | regulation of immune system process                                | 1525 | 0.00207315 | 0.061952 | 102 |
| GO:2000113 | negative regulation of cellular macromolecule biosynthetic process | 1583 | 0.00631033 | 0.121338 | 102 |
| GO:1901700 | response to oxygen-containing compound                             | 1535 | 0.00358557 | 0.085942 | 101 |
| GO:0007267 | cell-cell signaling                                                | 1583 | 0.01164082 | 0.170971 | 100 |

**Table S2.** Z score-elite to perform GO pruning for over-representation analysis (ORA) to determine BPs are enriched in up-regulation of gene sets of 5-demethyl NOB-treated cells.

| Ontology Name (Ontology-ID)                                                                            | Number in Ontology | Z Score     | FisherExactP | AdjustedP   |
|--------------------------------------------------------------------------------------------------------|--------------------|-------------|--------------|-------------|
| regulation of melanocyte differentiation (GO:0045634)                                                  | 6                  | 8.57748987  | 0.000135088  | 0.303291312 |
| base conversion or substitution editing (GO:0016553)                                                   | 7                  | 7.888479254 | 0.00023303   | 0.319354505 |
| response to nicotine (GO:0035094)                                                                      | 38                 | 7.413373511 | 6.95E-06     | 0.053629855 |
| L-serine metabolic process (GO:0006563)                                                                | 8                  | 7.329666839 | 0.000367531  | 0.362123628 |
| neurexin binding (GO:0042043)                                                                          | 13                 | 5.556348362 | 0.001747336  | 0.653836658 |
| serine family amino acid biosynthetic process (GO:0009070)                                             | 14                 | 5.316930668 | 0.002192355  | 0.68910097  |
| developmental process (GO:0032502)                                                                     | 4327               | 4.704277813 | 6.75E-06     | 0.053629855 |
| locomotory behavior (GO:0007626)                                                                       | 158                | 4.630830505 | 0.000248982  | 0.319354505 |
| regulation of metabolic process (GO:0019222)                                                           | 5797               | 4.567254189 | 1.02E-05     | 0.053629855 |
| neuron-neuron synaptic transmission (GO:0007270)                                                       | 44                 | 4.565548548 | 0.001501427  | 0.620128701 |
| cellular response to hypoxia (GO:0071456)                                                              | 80                 | 4.455814687 | 0.000876245  | 0.535389999 |
| reactive oxygen species metabolic process (GO:0072593)                                                 | 81                 | 4.412745072 | 0.000943573  | 0.535389999 |
| peptidyl-threonine phosphorylation (GO:0018107)                                                        | 32                 | 4.360884349 | 0.003160751  | 0.856454641 |
| hydrolase activity, acting on carbon-nitrogen (but not peptide) bonds, in cyclic amidines (GO:0016814) | 33                 | 4.270015079 | 0.003542919  | 0.871583442 |
| peptidyl-serine phosphorylation (GO:0018105)                                                           | 70                 | 4.058041512 | 0.002261814  | 0.68917197  |
| nuclear inner membrane (GO:0005637)                                                                    | 36                 | 4.018462464 | 0.004874942  | 0.910092474 |
| carboxylic acid transport (GO:0046942)                                                                 | 196                | 3.779786557 | 0.001499609  | 0.620128701 |
| Rho guanyl-nucleotide exchange factor activity (GO:0005089)                                            | 77                 | 3.757954887 | 0.00365685   | 0.871583442 |
| adult behavior (GO:0030534)                                                                            | 122                | 3.739220884 | 0.002495858  | 0.740092592 |
| defense response to virus (GO:0051607)                                                                 | 151                | 3.626587082 | 0.002634963  | 0.766871877 |

|                                                                     |      |             |             |             |
|---------------------------------------------------------------------|------|-------------|-------------|-------------|
| phospholipid binding (GO:0005543)                                   | 537  | 3.399391269 | 0.002091882 | 0.68910097  |
| fibroblast growth factor receptor<br>signaling pathway (GO:0008543) | 165  | 3.317303207 | 0.004735488 | 0.910092474 |
| nerve growth factor receptor signaling<br>pathway (GO:0048011)      | 284  | 3.28090124  | 0.003556264 | 0.871583442 |
| regulation of signaling (GO:0023051)                                | 2072 | 3.231634987 | 0.002280284 | 0.68917197  |
| negative regulation of biological process<br>(GO:0048519)           | 3354 | 3.229507585 | 0.001939408 | 0.68910097  |

**Table S3.** Z score-elite to perform GO pruning for ORA to determine BPs are enriched in down-regulation of gene sets of 5-demethyl NOB-treated cells.

| Ontology Name (Ontology-ID)                                     | Number in Ontology | Z Score     | FisherExactP | AdjustedP   |
|-----------------------------------------------------------------|--------------------|-------------|--------------|-------------|
| macromolecule biosynthetic process (GO:0009059)                 | 3076               | 7.360361121 | 1.41E-11     | 2.22E-07    |
| response to wounding (GO:0009611)                               | 577                | 7.279810172 | 2.08E-09     | 1.92E-06    |
| regulation of response to external stimulus (GO:0032101)        | 425                | 7.230007024 | 6.34E-09     | 4.75E-06    |
| RNA biosynthetic process (GO:0032774)                           | 2587               | 6.881282891 | 2.79E-10     | 5.48E-07    |
| regulation of biosynthetic process (GO:0009889)                 | 4056               | 6.764983199 | 2.47E-10     | 5.48E-07    |
| nucleic acid binding (GO:0003676)                               | 3801               | 6.643755478 | 4.48E-10     | 7.83E-07    |
| regulation of nitrogen compound metabolic process (GO:0051171)  | 4215               | 6.491559476 | 9.79E-10     | 1.28E-06    |
| RAGE receptor binding (GO:0050786)                              | 9                  | 6.366768896 | 0.000806269  | 0.081750518 |
| muscle organ morphogenesis (GO:0048644)                         | 9                  | 6.366768896 | 0.000806269  | 0.081750518 |
| negative regulation of biological process (GO:0048519)          | 3354               | 6.318352382 | 3.54E-09     | 2.93E-06    |
| organ development (GO:0048513)                                  | 1122               | 5.920573148 | 1.63E-07     | 7.32E-05    |
| neutrophil chemotaxis (GO:0030593)                              | 37                 | 5.815355333 | 0.00014343   | 0.023980248 |
| Nucleus (GO:0005634)                                            | 5712               | 5.745613228 | 3.03E-08     | 1.68E-05    |
| cellular response to zinc ion (GO:0071294)                      | 11                 | 5.66874635  | 0.001532574  | 0.123517574 |
| positive regulation of cellular process (GO:0048522)            | 3483               | 5.610790188 | 1.22E-07     | 5.62E-05    |
| regulation of multicellular organismal development (GO:2000026) | 1214               | 5.49852977  | 8.54E-07     | 0.000353262 |
| oocyte development (GO:0048599)                                 | 12                 | 5.384222221 | 0.002010205  | 0.151886435 |
| positive regulation of developmental process (GO:0051094)       | 732                | 5.356725902 | 3.72E-06     | 0.001245438 |
| adipose tissue development (GO:0060612)                         | 21                 | 5.264192124 | 0.001029963  | 0.093160382 |
| Intracellular (GO:0005622)                                      | 1679               | 5.211591409 | 2.09E-06     | 0.000782461 |
| digestive tract morphogenesis (GO:0048546)                      | 22                 | 5.111282344 | 0.001237136  | 0.106960453 |
| DNA-dependent DNA replication initiation (GO:0006270)           | 22                 | 5.111282344 | 0.001237136  | 0.106960453 |



|                                                                             |      |             |             |             |
|-----------------------------------------------------------------------------|------|-------------|-------------|-------------|
| response to organic cyclic compound<br>(GO:0014070)                         | 224  | 5.068078439 | 3.95E-05    | 0.008742307 |
| sequence-specific DNA binding<br>transcription factor activity (GO:0003700) | 1105 | 4.988714918 | 7.05E-06    | 0.002172239 |
| response to corticosteroid stimulus<br>(GO:0031960)                         | 128  | 4.944416466 | 0.000125764 | 0.022260492 |
| regulation of myeloid cell apoptosis<br>(GO:0033032)                        | 14   | 4.904844533 | 0.003218871 | 0.202362535 |
| glial cell migration (GO:0008347)                                           | 14   | 4.904844533 | 0.003218871 | 0.202362535 |
| homeostasis of number of cells<br>(GO:0048872)                              | 95   | 4.842104051 | 0.000247191 | 0.034998641 |
| regulation of binding (GO:0051098)                                          | 194  | 4.783301497 | 0.000106436 | 0.019450634 |
| Nucleosome (GO:0000786)                                                     | 115  | 4.759823859 | 0.000230003 | 0.033697955 |
| embryonic morphogenesis (GO:0048598)                                        | 386  | 4.728371988 | 5.10E-05    | 0.010980407 |
| cellular response to cadmium ion<br>(GO:0071276)                            | 15   | 4.69989484  | 0.003958384 | 0.232996127 |
| purinergic receptor activity (GO:0035586)                                   | 39   | 4.524093727 | 0.001570667 | 0.125941824 |
| mammary gland epithelial cell<br>differentiation (GO:0060644)               | 16   | 4.51324348  | 0.004792996 | 0.257968241 |
| lung morphogenesis (GO:0060425)                                             | 16   | 4.51324348  | 0.004792996 | 0.257968241 |
| ribonucleoside catabolic process<br>(GO:0042454)                            | 16   | 4.51324348  | 0.004792996 | 0.257968241 |
| response to interferon-alpha (GO:0035455)                                   | 16   | 4.51324348  | 0.004792996 | 0.257968241 |
| heterocycle biosynthetic process<br>(GO:0018130)                            | 254  | 4.478719897 | 0.000173029 | 0.027748239 |
| response to other organism (GO:0051707)                                     | 460  | 4.458508979 | 0.000126062 | 0.022260492 |
| zinc ion binding (GO:0008270)                                               | 2188 | 4.441859025 | 3.90E-05    | 0.008742307 |
| positive regulation of multicellular<br>organismal process (GO:0051240)     | 561  | 4.273922072 | 0.000178998 | 0.02841555  |
| cardiac septum morphogenesis<br>(GO:0060411)                                | 43   | 4.217344032 | 0.002443836 | 0.176180387 |
| osteoblast differentiation (GO:0001649)                                     | 59   | 4.177375884 | 0.0018505   | 0.143972597 |
| placenta blood vessel development<br>(GO:0060674)                           | 31   | 4.06411586  | 0.004553087 | 0.256014421 |
| transcription factor complex (GO:0005667)                                   | 357  | 4.053902256 | 0.000387864 | 0.04880824  |
| extracellular region part (GO:0044421)                                      | 1294 | 4.014004551 | 0.000254325 | 0.035687279 |
| nucleosome assembly (GO:0006334)                                            | 164  | 3.948564026 | 0.001049211 | 0.094225136 |
| transmembrane receptor protein                                              | 187  | 3.947020246 | 0.000930272 | 0.088073262 |

|                                                                                             |      |             |             |             |
|---------------------------------------------------------------------------------------------|------|-------------|-------------|-------------|
| serine/threonine kinase signaling pathway<br>(GO:0007178)                                   |      |             |             |             |
| multicellular organismal process<br>(GO:0032501)                                            | 3075 | 3.902724402 | 0.000184334 | 0.028969939 |
| biomineral tissue development<br>(GO:0031214)                                               | 67   | 3.773950895 | 0.003538272 | 0.216715997 |
| cytokine activity (GO:0005125)                                                              | 249  | 3.701696961 | 0.0013129   | 0.111532615 |
| translational termination (GO:0006415)                                                      | 108  | 3.697086634 | 0.00267975  | 0.182585571 |
| transcription factor binding (GO:0008134)                                                   | 502  | 3.679733759 | 0.000969317 | 0.090677308 |
| cell activation (GO:0001775)                                                                | 594  | 3.667082356 | 0.000913158 | 0.087798771 |
| system development (GO:0048731)                                                             | 787  | 3.635033067 | 0.001083921 | 0.096789179 |
| regulation of cell-substrate adhesion<br>(GO:0010810)                                       | 110  | 3.634815854 | 0.003002955 | 0.191847329 |
| regulation of ossification (GO:0030278)                                                     | 178  | 3.63328876  | 0.002021944 | 0.15198069  |
| anatomical structure formation involved in<br>morphogenesis (GO:0048646)                    | 660  | 3.632124683 | 0.001009588 | 0.092787588 |
| pigment metabolic process (GO:0042440)                                                      | 71   | 3.595116498 | 0.004718971 | 0.257968241 |
| response to lipid (GO:0033993)                                                              | 71   | 3.595116498 | 0.004718971 | 0.257968241 |
| response to drug (GO:0042493)                                                               | 340  | 3.546389772 | 0.002008685 | 0.151886435 |
| cofactor biosynthetic process (GO:0051188)                                                  | 159  | 3.52682017  | 0.002804565 | 0.182585571 |
| nucleobase, nucleoside, nucleotide and<br>nucleic acid biosynthetic process<br>(GO:0034654) | 186  | 3.466587856 | 0.002846365 | 0.182585571 |
| pattern binding (GO:0001871)                                                                | 213  | 3.431979867 | 0.002789777 | 0.182585571 |
| structural constituent of ribosome<br>(GO:0003735)                                          | 193  | 3.327775383 | 0.00377256  | 0.224581624 |
| positive regulation of protein<br>serine/threonine kinase activity<br>(GO:0071902)          | 246  | 3.315665013 | 0.003297497 | 0.205648666 |
| G1/S transition of mitotic cell cycle<br>(GO:0000082)                                       | 169  | 3.305842127 | 0.004331826 | 0.247559928 |
| regulation of growth (GO:0040008)                                                           | 572  | 3.296905376 | 0.003267568 | 0.204594032 |
| regulation of caspase activity (GO:0043281)                                                 | 195  | 3.289238713 | 0.004077251 | 0.236450454 |
| cellular component morphogenesis<br>(GO:0032989)                                            | 482  | 3.26353922  | 0.003901424 | 0.230506713 |
| response to oxidative stress (GO:0006979)                                                   | 254  | 3.187898147 | 0.004317985 | 0.247559928 |
| regulation of cell activation (GO:0050865)                                                  | 460  | 3.173132429 | 0.003554764 | 0.216715997 |
| cell proliferation (GO:0008283)                                                             | 621  | 3.146180856 | 0.004821799 | 0.258632761 |

**Table S4.** The core enrichment genes associated with cell population proliferation (GO: 0008283) was down-regulated by 5-demethyl NOB treatment.

| Symbol   | Title                                             | log2(FC) | p value   | Rank in metric score |
|----------|---------------------------------------------------|----------|-----------|----------------------|
| ID1      | inhibitor of DNA binding 1, HLH protein           | -4.32    | 1.21E-05  | -4.491               |
| PDGFA    | platelet derived growth factor subunit A          | -2.67    | 2.44E-05  | -3.817               |
| EGR3     | early growth response 3                           | -2.90    | 2.45E-04  | -3.56                |
| TNF      | tumor necrosis factor                             | -2.32    | 6.02E-06  | -3.339               |
| CRIP2    | cysteine rich protein 2                           | -2.87    | 6.48E-05  | -2.969               |
| CDK6     | cyclin dependent kinase 6                         | -1.96    | 1.17 E-04 | -2.957               |
| ATF3     | activating transcription factor 3                 | -1.98    | 1.13 E-03 | -2.771               |
| KLF10    | Kruppel like factor 10                            | -1.76    | 4.28E-05  | -2.719               |
| RGCC     | regulator of cell cycle                           | -2.30    | 2.32E-04  | -2.716               |
| GPR183   | G protein-coupled receptor 183                    | -1.59    | 1.30E-04  | -2.676               |
| PHLDA2   | pleckstrin homology like domain family A member 2 | -1.71    | 4.28E-06  | -2.665               |
| TNFRSF21 | TNF receptor superfamily member 21                | -1.64    | 4.80E-04  | -2.585               |
| EGR1     | early growth response 1                           | -1.64    | 5.98E-05  | -2.56                |
| KLF9     | Kruppel like factor 9                             | -1.59    | 1.21E-04  | -2.509               |
| SMAD1    | SMAD family member 1                              | -1.54    | 1.55E-04  | -2.436               |
| ZFP36    | ZFP36 ring finger protein                         | -1.49    | 9.57E-04  | -2.366               |
| PITX2    | paired like homeodomain 2                         | -1.51    | 7.87E-04  | -2.344               |
| TNFSF14  | TNF superfamily member 14                         | -1.57    | 6.71E-04  | -2.287               |
| CYP1B1   | cytochrome P450 family 1 subfamily B member 1     | -1.41    | 3.00E-04  | -2.255               |
| CXCL10   | C-X-C motif chemokine ligand 10                   | -1.37    | 7.64E-05  | -2.207               |
| VEGFC    | vascular endothelial growth factor C              | -1.35    | 0.14E-04  | -2.174               |
| OSM      | oncostatin M                                      | -1.34    | 4.48E-05  | -2.169               |
| PDPN     | podoplanin                                        | -1.33    | 2.40E-04  | -2.157               |
| ANXA1    | annexin A1                                        | -1.32    | 2.51 E-04 | -2.146               |
| F3       | coagulation factor III, tissue factor             | -1.32    | 3.68E-04  | -2.119               |
| CCNE1    | cyclin E1                                         | -1.29    | 7.25E-05  | -2.102               |

|         |                                                                |       |            |        |
|---------|----------------------------------------------------------------|-------|------------|--------|
| PROK2   | prokineticin 2                                                 | -1.28 | 7.23E-04   | -2.088 |
| TBX2    | T-box transcription factor 2                                   | -1.31 | 1.27 E-03  | -2.085 |
| LGR4    | leucine rich repeat containing G<br>protein-coupled receptor 4 | -1.27 | 2.18E-05   | -2.069 |
| JARID2  | jumonji and AT-rich interaction<br>domain containing 2         | -1.44 | 3.68E-03   | -2.053 |
| HES1    | hes family bHLH transcription factor<br>1                      | -1.26 | 1.73E-04   | -2.05  |
| CDCA7   | cell division cycle associated 7                               | -1.31 | 1.629 E-04 | -2.032 |
| TREM2   | triggering receptor expressed on<br>myeloid cells 2            | -1.24 | 2.64E-04   | -2.027 |
| DIXDC1  | DIX domain containing 1                                        | -1.25 | 7.61E-04   | -2.024 |
| NME1    | NME/NM23 nucleoside diphosphate<br>kinase 1                    | -1.05 | 1.35E-04   | -1.996 |
| CRTAM   | cytotoxic and regulatory T cell<br>molecule                    | -1.29 | 1.49 E-03  | -1.99  |
| FGF2    | fibroblast growth factor 2                                     | -1.74 | 3.04E-05   | -1.982 |
| ASCL2   | achaete-scute family bHLH<br>transcription factor 2            | -1.20 | 4.08 E-04  | -1.976 |
| IGFBP7  | insulin like growth factor binding<br>protein 7                | -1.27 | 1.07 E-03  | -1.965 |
| OSGIN1  | oxidative stress induced growth<br>inhibitor 1                 | -1.18 | 1.98 E-04  | -1.956 |
| PRDX4   | peroxiredoxin 4                                                | -1.46 | 5.53E-03   | -1.94  |
| ING2    | inhibitor of growth family member 2                            | -1.17 | 1.22E-03   | -1.939 |
| GAL     | galanin and GMAP prepropeptide                                 | -1.42 | 4.27E-04   | -1.936 |
| CXCL11  | C-X-C motif chemokine ligand 11                                | -1.18 | 1.94E-04   | -1.936 |
| GATA2   | GATA binding protein 2                                         | -1.15 | 9.08E-04   | -1.914 |
| ISL1    | ISL LIM homeobox 1                                             | -1.17 | 8.30E-04   | -1.907 |
| IL18RAP | interleukin 18 receptor accessory<br>protein                   | -1.16 | 7.25E-05   | -1.9   |
| CSPG4   | chondroitin sulfate proteoglycan 4                             | -1.16 | 3.54E-03   | -1.891 |
| ACVR1C  | activin A receptor type 1C                                     | -1.50 | 8.19E-03   | -1.891 |
| CHST11  | carbohydrate sulfotransferase 11                               | -1.13 | 6.82E-04   | -1.87  |
| AHR     | aryl hydrocarbon receptor                                      | -1.33 | 4.00E-04   | -1.799 |
| IFIT3   | interferon induced protein with<br>tetratricopeptide repeats 3 | -1.07 | 1.48E-04   | -1.785 |

|          |                                                          |       |           |        |
|----------|----------------------------------------------------------|-------|-----------|--------|
| ADORA3   | adenosine A3 receptor                                    | -1.07 | 4.77E-04  | -1.785 |
| PSMB10   | proteasome 20S subunit beta 10                           | -1.07 | 1.73E-03  | -1.763 |
| GIN54    | GIN5 complex subunit 4                                   | -1.06 | 1.613E-03 | -1.755 |
| FOXF1    | forkhead box F1                                          | -1.06 | 6.71E-05  | -1.754 |
| CCND1    | cyclin D1                                                | -1.05 | 9.65E-04  | -1.734 |
| PRTN3    | proteinase 3                                             | -1.32 | 3.47E-04  | -1.727 |
| CDKN1A   | cyclin dependent kinase inhibitor 1A                     | -1.03 | 3.72 E-04 | -1.713 |
| JUNB     | "JunB proto-oncogene, AP-1 transcription factor subunit  | -1.02 | 2.15E-04  | -1.7   |
| SCG2     | secretogranin II                                         | -0.98 | 2.55E-03  | -1.665 |
| SETMAR   | SET domain and mariner transposase fusion gene           | -0.94 | 1.42E-04  | -1.583 |
| LMNA     | lamin A/C                                                | -0.94 | 7.34E-04  | -1.581 |
| NRARP    | NOTCH regulated ankyrin repeat protein                   | -0.94 | 5.90E-04  | -1.571 |
| MARCKSL1 | MARCKS like 1                                            | -0.92 | 4.49E-04  | -1.552 |
| SIX1     | SIX homeobox 1                                           | -1.02 | 7.00E-03  | -1.55  |
| LTK      | leukocyte receptor tyrosine kinase                       | -0.92 | 1.15E-04  | -1.544 |
| IGFBP3   | insulin like growth factor binding protein 3             | -1.02 | 5.07E-03  | -1.542 |
| PYCARD   | PYD and CARD domain containing                           | -0.91 | 2.27E-04  | -1.534 |
| PNP      | purine nucleoside phosphorylase                          | -0.88 | 3.55E-03  | -1.511 |
| WFDC1    | WAP four-disulfide core domain 1                         | -0.90 | 2.37E-04  | -1.507 |
| LTBP3    | latent transforming growth factor beta binding protein 3 | -0.88 | 3.69E-03  | -1.502 |

**Table S5.** The hallmark gene sets of molecular pathways enriched and down-regulated in response to 5-demethyl NOB treatment.

| GENE SET                                      | SIZE | ES    | NES   | NOM<br>p-value | FDR<br>q-value | LEADING<br>EDGE                       |
|-----------------------------------------------|------|-------|-------|----------------|----------------|---------------------------------------|
| HALLMARK TNFA<br>SIGNALING VIA NFKB           | 82   | -0.52 | -3.43 | 0              | 0              | tags=46%,<br>list=12%,<br>signal=51%  |
| HALLMARK<br>INFLAMMATORY RESPONSE             | 57   | -0.4  | -2.56 | 0              | 0              | tags=58%,<br>list=28%,<br>signal=79%  |
| HALLMARK MYC TARGETS<br>V1                    | 59   | -0.38 | -2.38 | 0              | 0              | tags=95%,<br>list=57%,<br>signal=215% |
| HALLMARK TGF BETA<br>SIGNALING                | 16   | -0.59 | -2.31 | 0              | 0              | tags=44%,<br>list=12%,<br>signal=49%  |
| HALLMARK EPITHELIAL<br>MESENCHYMAL TRANSITION | 43   | -0.39 | -2.17 | 0              | 0.003          | tags=35%,<br>list=13%,<br>signal=40%  |
| HALLMARK ALLOGRAFT<br>REJECTION               | 36   | -0.4  | -2.08 | 0.002          | 0.008          | tags=61%,<br>list=32%,<br>signal=88%  |
| HALLMARK E2F TARGETS                          | 44   | -0.33 | -1.89 | 0.003          | 0.021          | tags=77%,<br>list=48%,<br>signal=147% |
| HALLMARK MYC TARGETS<br>V2                    | 18   | -0.48 | -1.95 | 0.004          | 0.016          | tags=94%,<br>list=48%,<br>signal=181% |
